# Supplementary material for: Synthesis of Near-Infrared-Absorbing Anionic Heptamethine Cyanine Dyes with Trifluoromethyl Groups
Source: MDPI journal article supplement (doi:10.3390/molecules28124650), 2023-06-08
Supplement: s1 [file s1]

## (Contents)

|                                                                                       |          |
|---------------------------------------------------------------------------------------|----------|
| $^1\text{H}$ , $^{13}\text{C}$ , $^{19}\text{F}$ NMR, IR and HRMS for <b>2a</b> ..... | S2–S4    |
| $^1\text{H}$ , $^{13}\text{C}$ NMR, IR and HRMS for <b>3</b> -.....                   | S5, S6   |
| $^1\text{H}$ , $^{13}\text{C}$ , $^{19}\text{F}$ NMR, IR and HRMS for <b>5a</b> ..... | S7–S9    |
| $^1\text{H}$ , $^{13}\text{C}$ NMR, IR and HRMS for <b>6</b> .....                    | S10, S11 |
| $^1\text{H}$ , $^{13}\text{C}$ NMR, IR and HRMS for <b>7</b> .....                    | S12, S13 |
| $^1\text{H}$ , $^{13}\text{C}$ , $^{19}\text{F}$ NMR, IR and HRMS for <b>8a</b> ..... | S14–S16  |
| Result of CV measurement for <b>5a</b> .....                                          | S17      |
| Results of TG–DTA experiments for <b>5a</b> , <b>7a</b> .....                         | S18      |

2-(2-Cyano-3,4-dimethyl-4-(trifluoromethyl)cyclopent-2-en-1-ylidene)malononitrile (2a) [1]

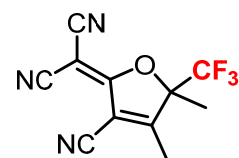

2a

$^1\text{H}$  NMR

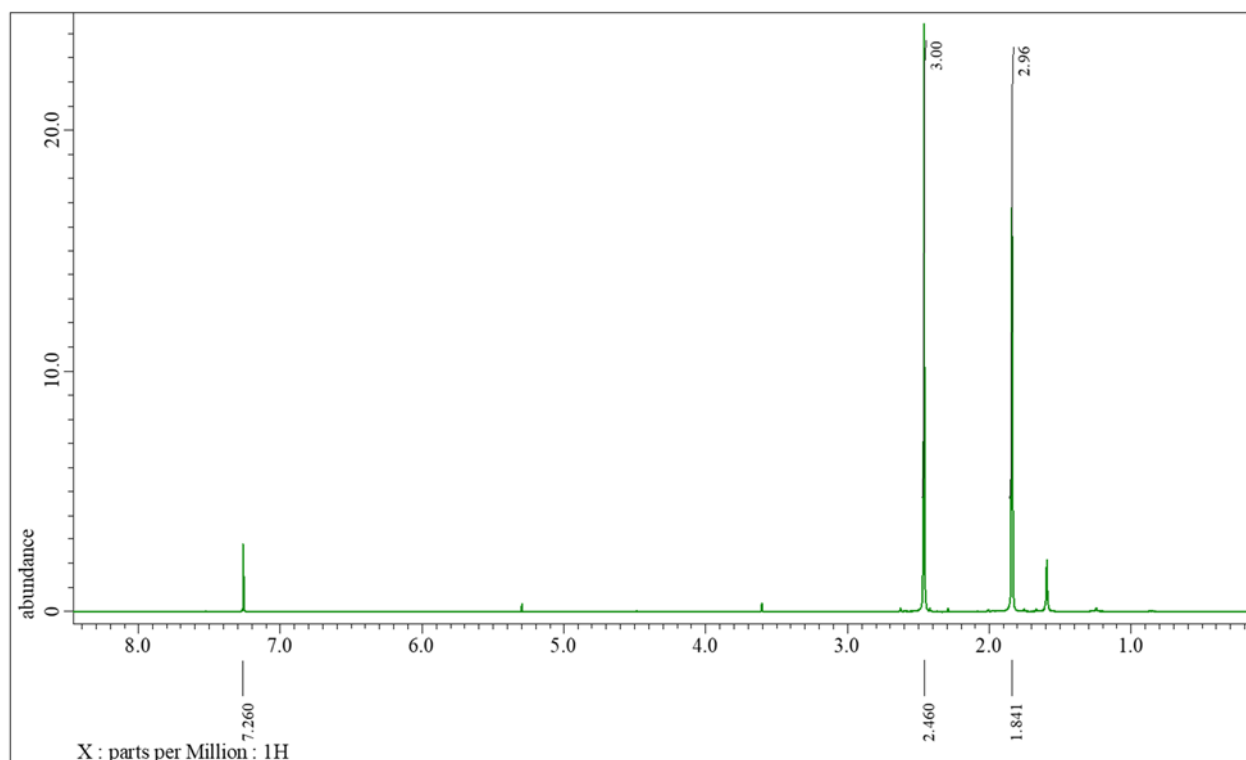

$^{13}\text{C}$  NMR

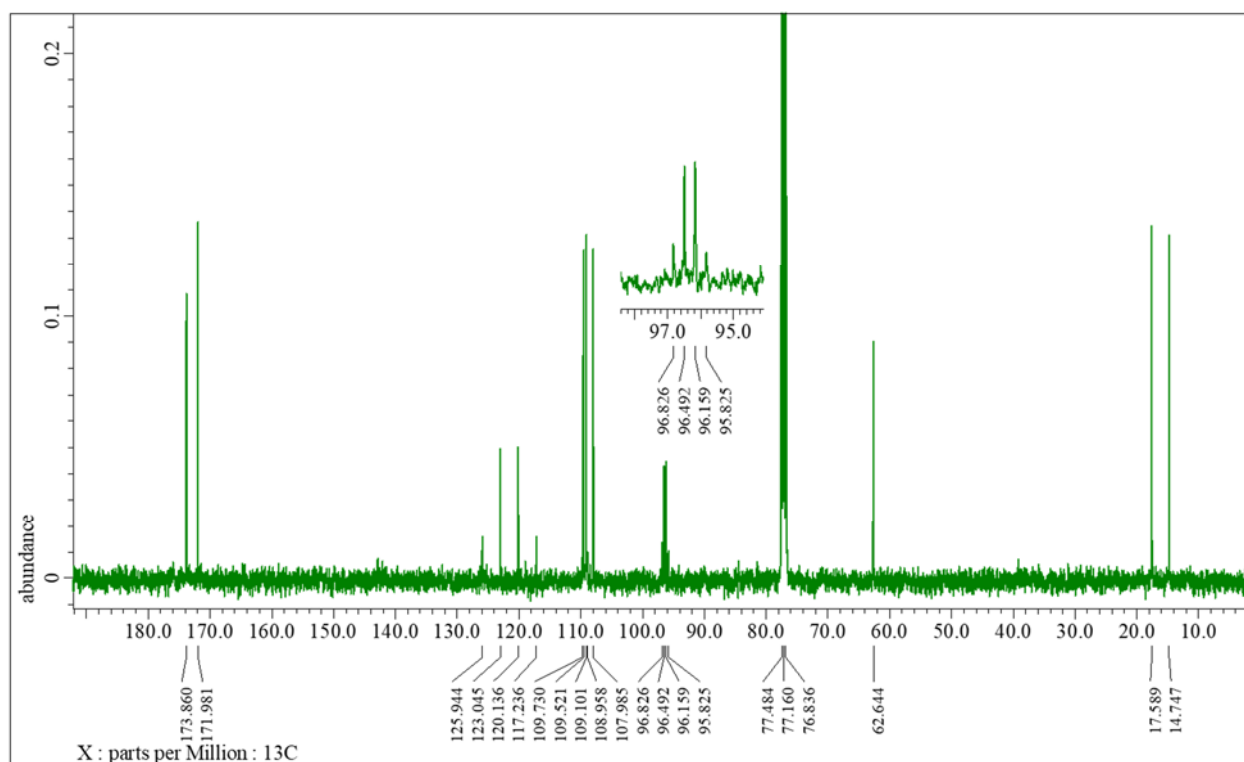

## $^{19}\text{F}$ NMR

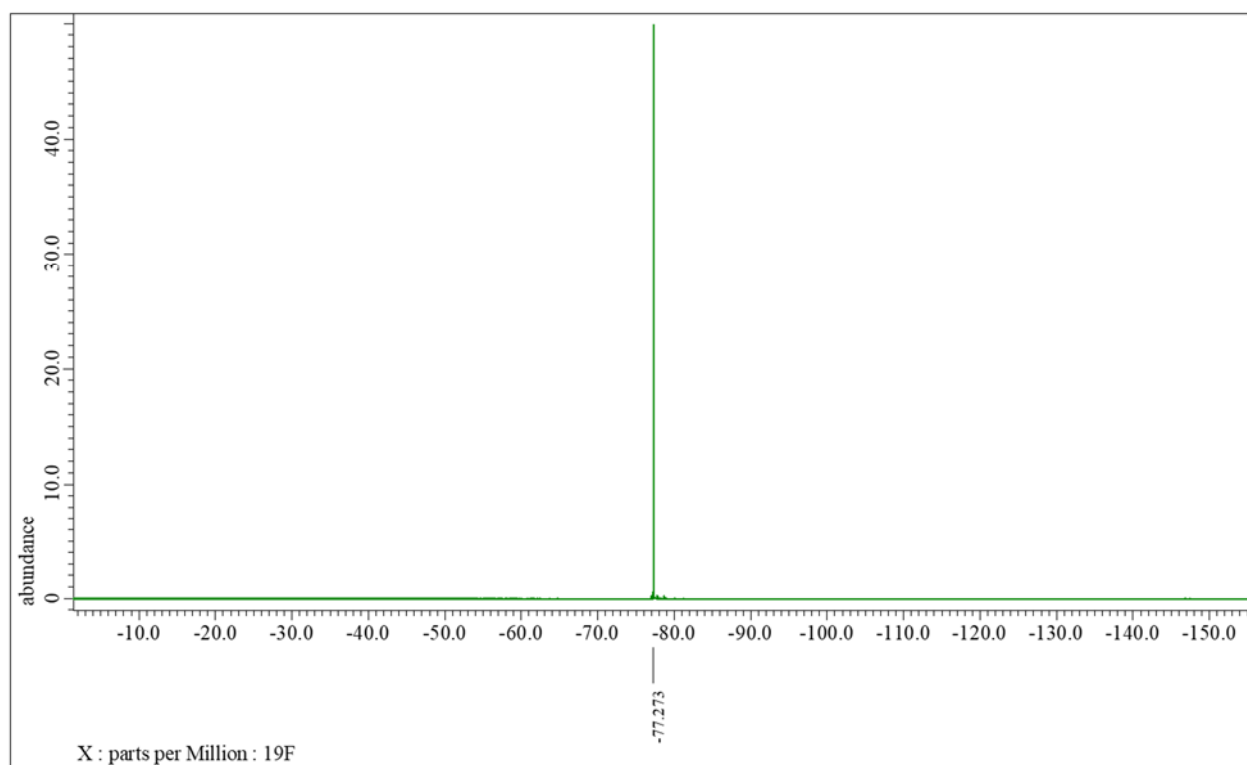

## IR

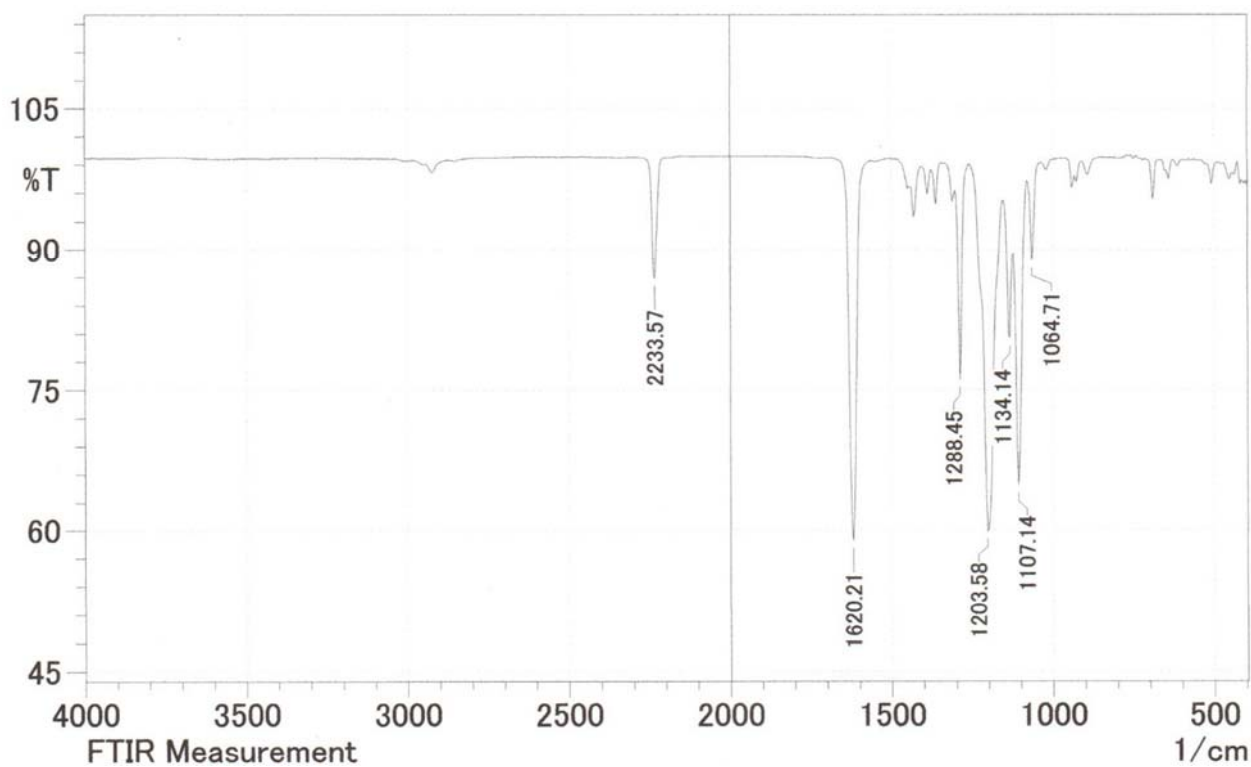

## Elemental Composition Report

Page 1

## Single Mass Analysis

Tolerance = 50.0 mDa / DBE: min = -1.5, max = 100.0

Element prediction: Off

Number of isotope peaks used for i-FIT = 3

Monoisotopic Mass, Even Electron Ions

4 formula(e) evaluated with 1 results within limits (up to 50 best isotopic matches for each mass)

Elements Used:

C: 11-11 H: 6-7 N: 3-3 O: 1-1 F: 3-3 Na: 0-1 Cl: 0-1

20220422\_2 15 (0.524)

1: TOF MS ES+

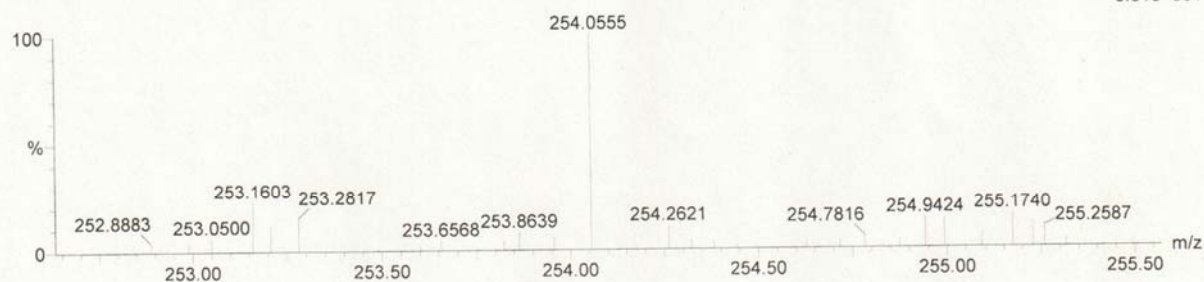

Minimum:

Maximum: 50.0 80.0 -1.5 100.0

| Mass     | Calc. Mass | mDa | PPM | DBE | i-FIT | i-FIT (Norm) | Formula        |
|----------|------------|-----|-----|-----|-------|--------------|----------------|
| 254.0555 | 254.0541   | 1.4 | 5.5 | 8.5 | 67.1  | 0.0          | C11 H7 N3 O F3 |

**(E)-2-Chloro-3-(hydroxymethylene)cyclohex-1-ene-1-carbaldehyde (3) [2]**

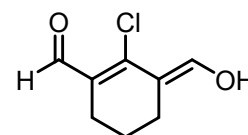

**3**

**<sup>1</sup>H NMR**

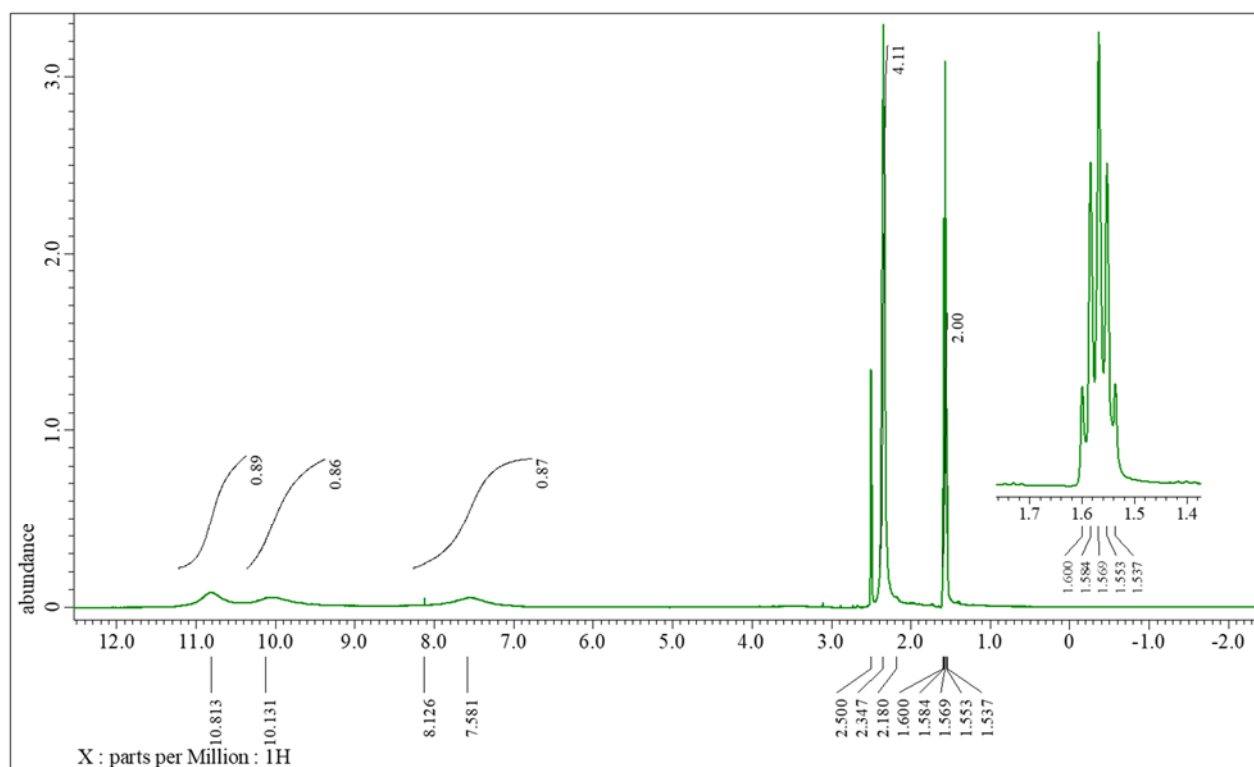

**<sup>13</sup>C NMR**

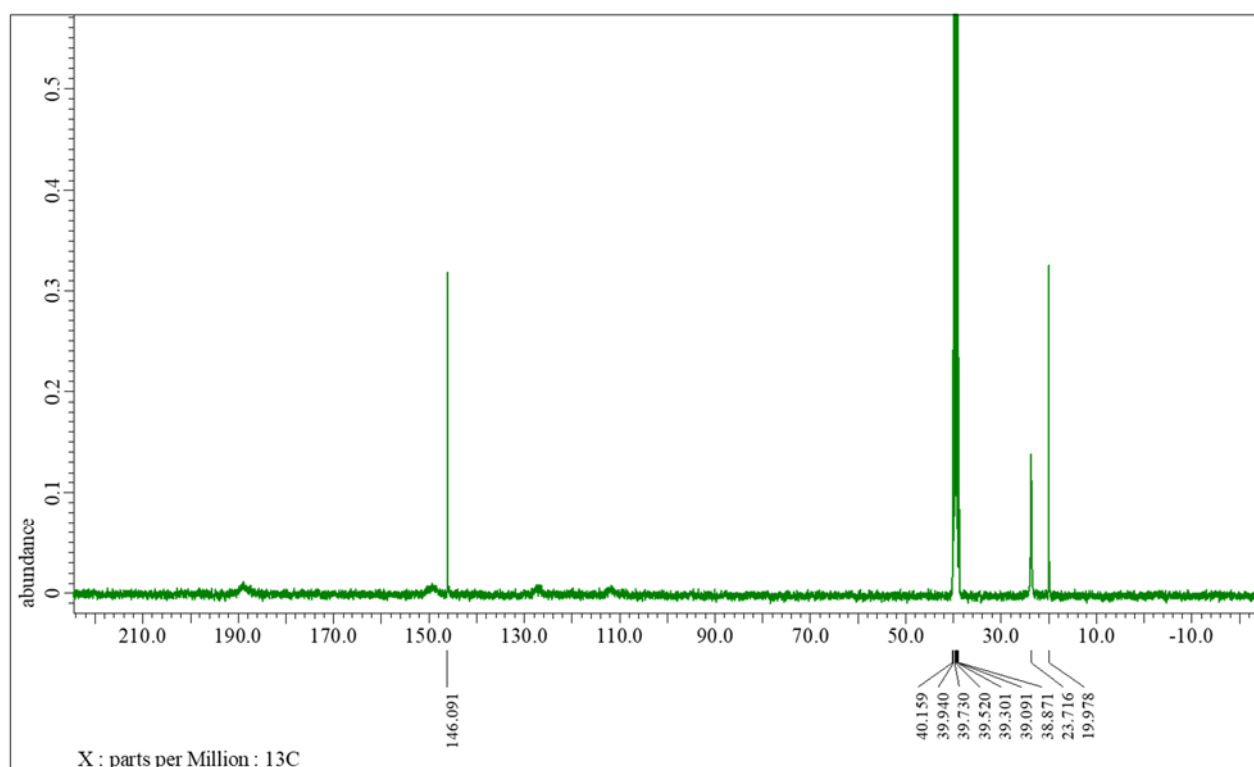

## IR

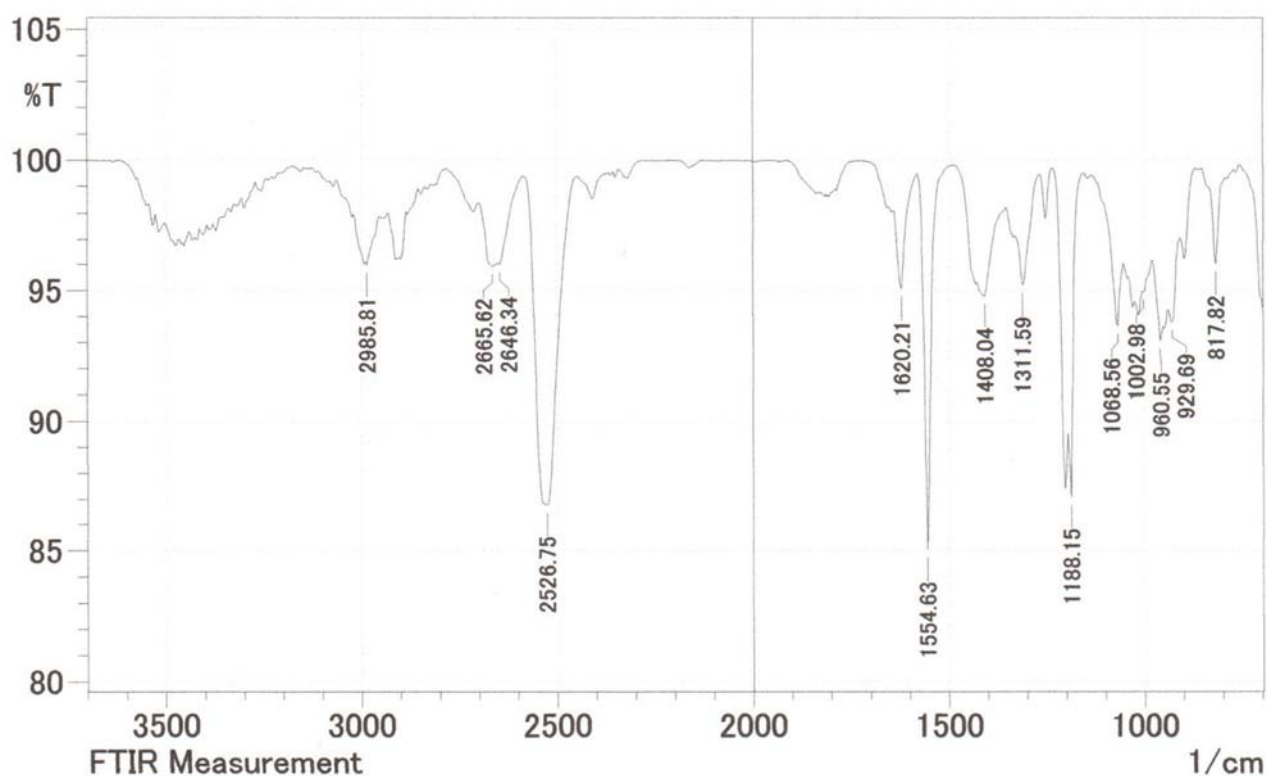

## HRMS

### Elemental Composition Report

Page 1

#### Single Mass Analysis

Tolerance = 50.0 mDa / DBE: min = -1.5, max = 100.0

Element prediction: Off

Number of isotope peaks used for i-FIT = 3

Monoisotopic Mass, Even Electron Ions

2 formula(e) evaluated with 1 results within limits (up to 50 best isotopic matches for each mass)

Elements Used:

C: 8-8 H: 9-10 O: 2-2 Na: 0-1 Cl: 1-1

20230422\_8 8 (0.284)

1: TOF MS ES+

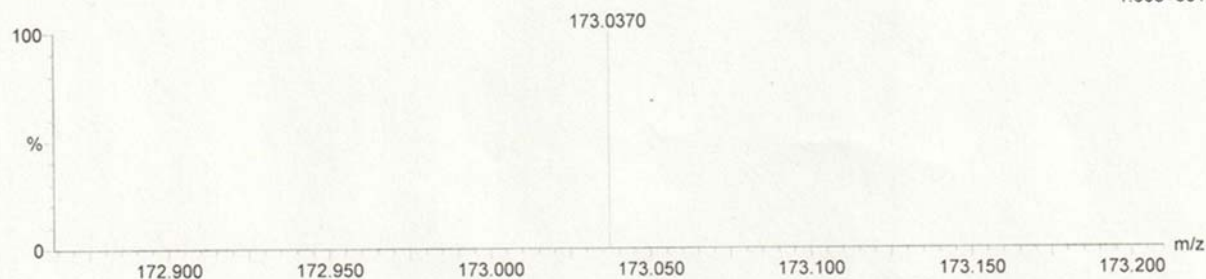

Minimum: -1.5  
Maximum: 50.0 80.0 100.0

| Mass     | Calc. Mass | mDa | PPM | DBE | i-FIT | i-FIT (Norm) | Formula      |
|----------|------------|-----|-----|-----|-------|--------------|--------------|
| 173.0370 | 173.0369   | 0.1 | 0.6 | 3.5 | 11.6  | 0.0          | C8 H10 O2 Cl |

**Tetrabutylammonium ((Z)-4-((E)-2-(2-chloro-3-((E)-2-(4-cyano-5-(dicyanomethylene)-2-methyl-2-(trifluoromethyl)-2,5-dihydrofuran-3-yl)vinyl)cyclohex-2-en-1-ylidene)ethylidene)-3-cyano-5-methyl-5-(trifluoromethyl)-4,5-dihydrofuran-2-yl)dicyanomethanide (5a)**

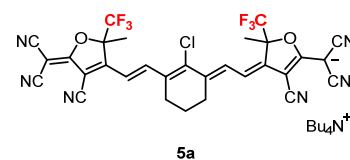

### $^1\text{H}$ NMR

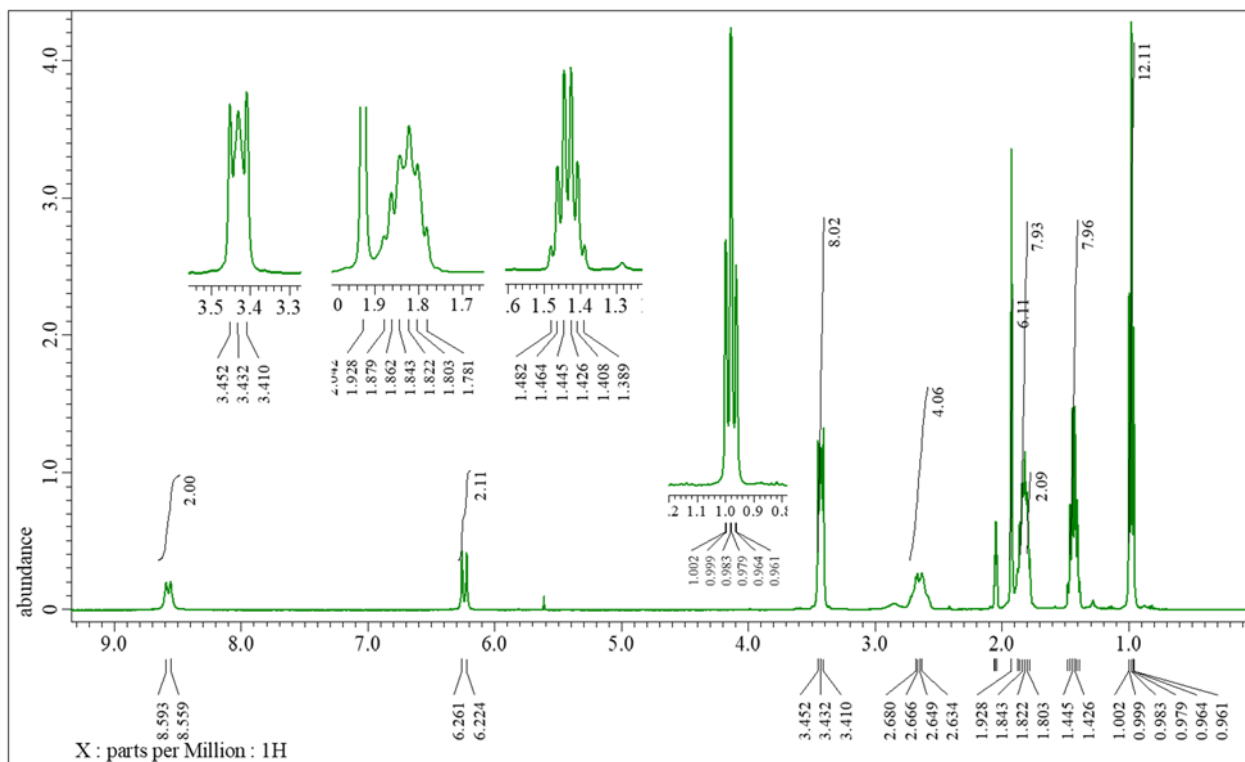

### $^{13}\text{C}$ NMR

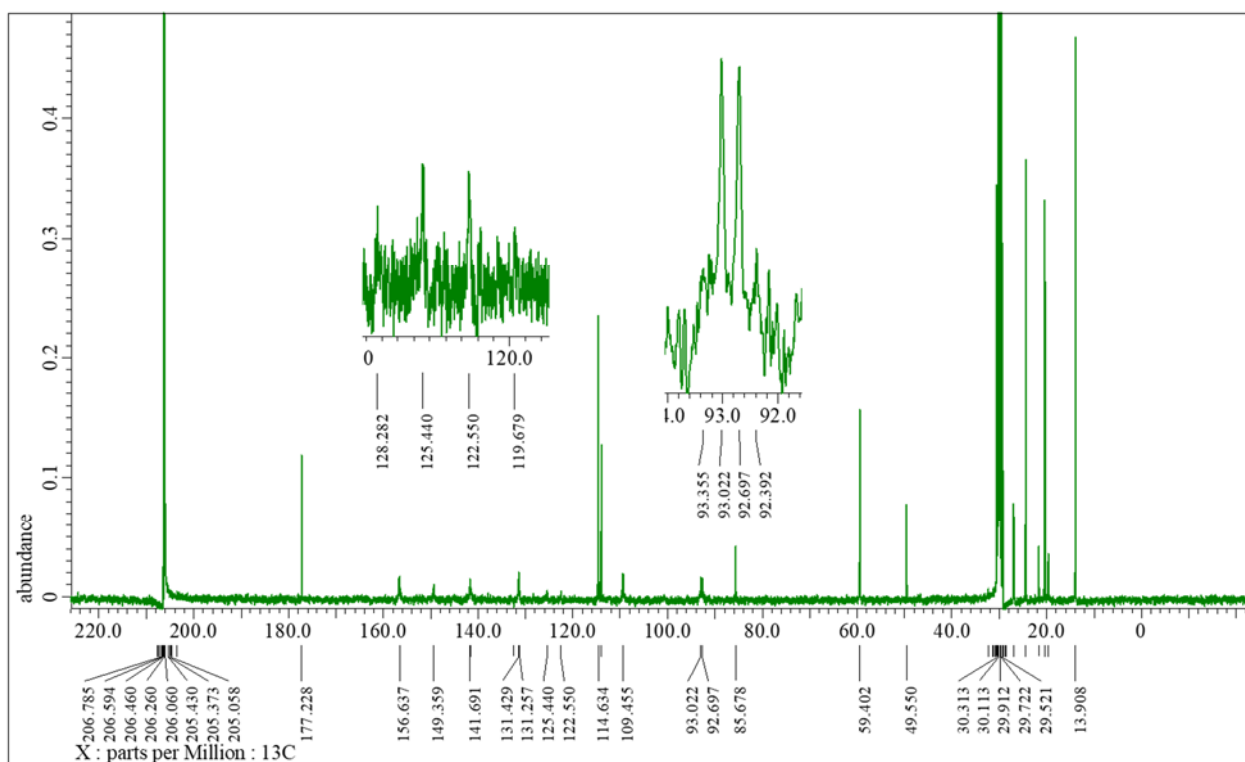

## $^{19}\text{F}$ NMR

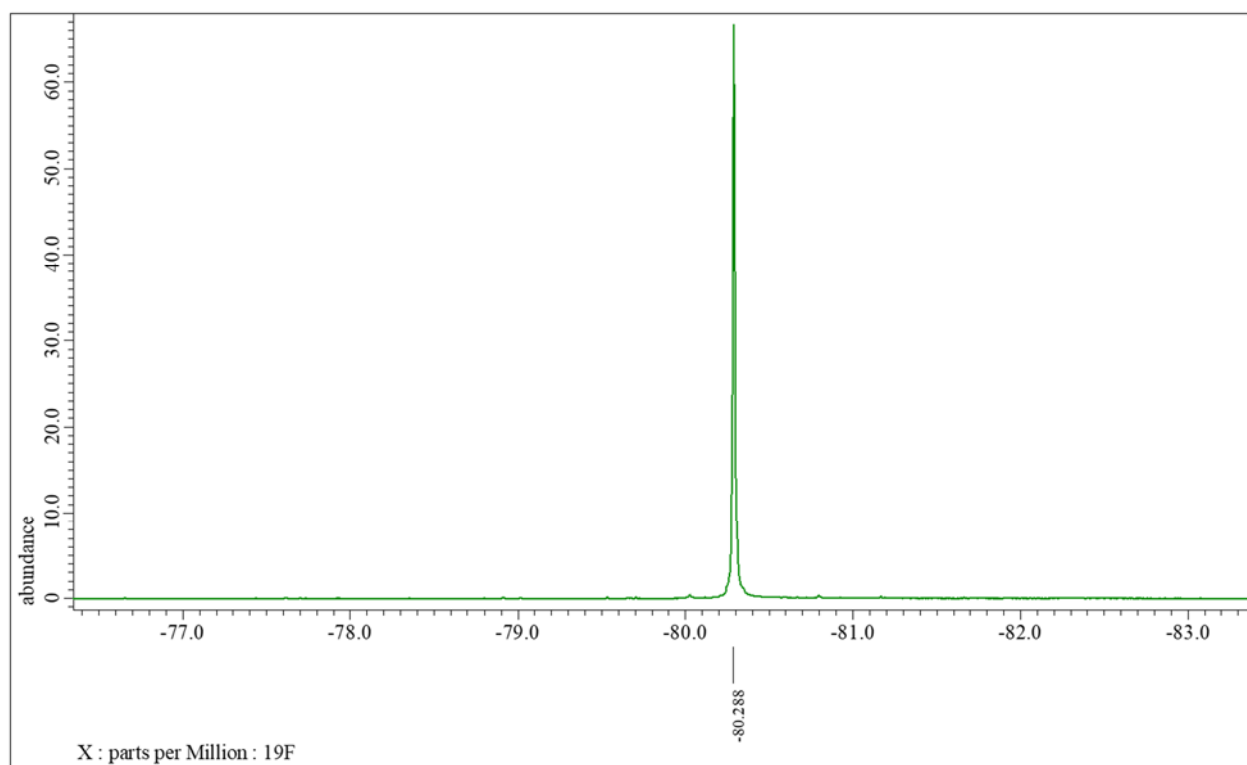

## IR

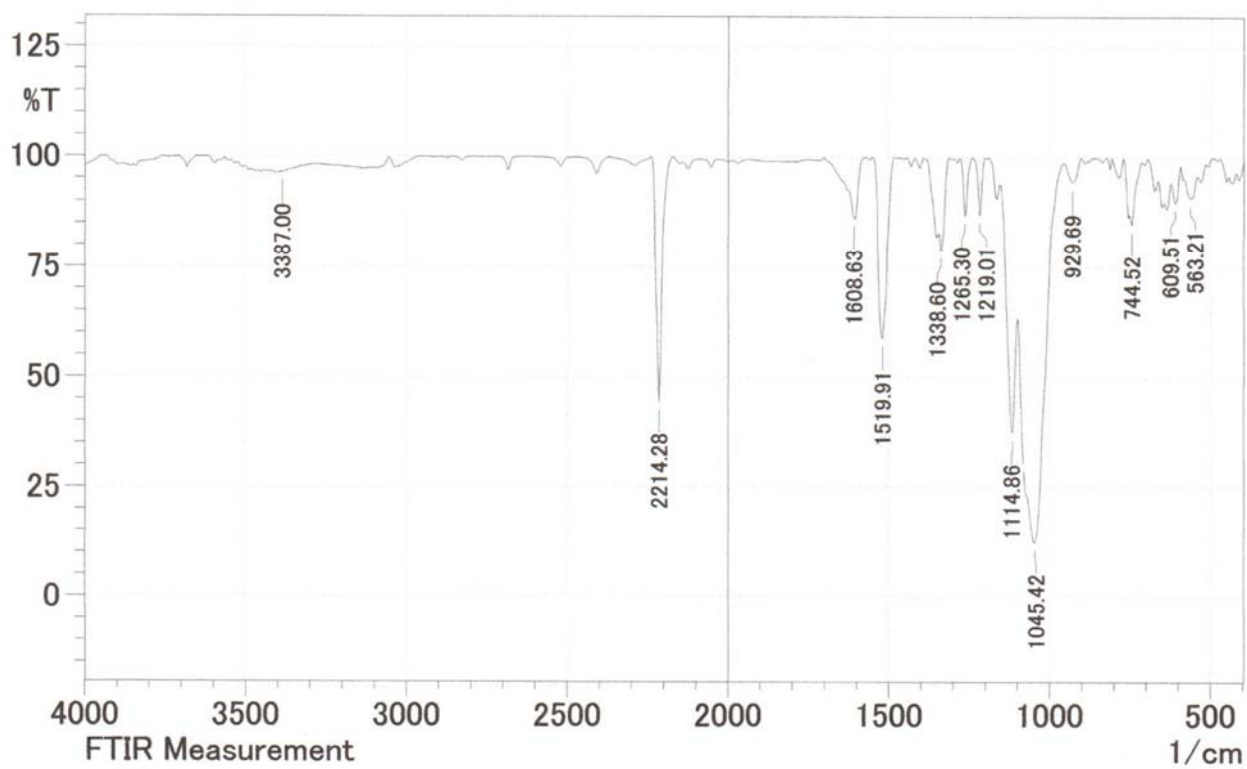



## Elemental Composition Report

Page 1

## Single Mass Analysis

Tolerance = 50.0 mDa / DBE: min = -1.5, max = 100.0

Element prediction: Off

Number of isotope peaks used for i-FIT = 3

Monoisotopic Mass, Even Electron Ions

2 formula(e) evaluated with 1 results within limits (up to 50 best isotopic matches for each mass)

Elements Used:

C: 30-30 H: 16-16 N: 6-6 O: 2-2 F: 6-6 Na: 0-1 Cl: 1-1

20230422\_4-1 13 (0.455)

1: TOF MS ES-

3.93e+003

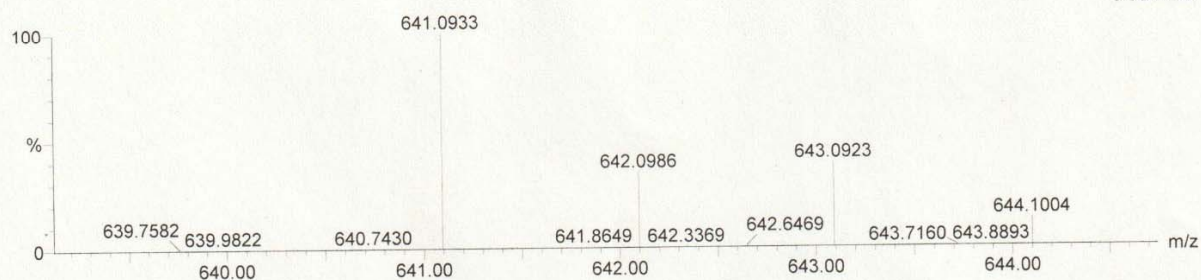

Minimum: -1.5  
Maximum: 50.0 80.0 100.0

| Mass     | Calc. Mass | mDa | PPM | DBE  | i-FIT | i-FIT (Norm) | Formula                |
|----------|------------|-----|-----|------|-------|--------------|------------------------|
| 641.0933 | 641.0927   | 0.6 | 0.9 | 22.5 | 32.8  | 0.0          | C30 H16 N6 O2<br>F6 Cl |

1, 2, 3, 3-tetramethyl-3*H*-indol-1-ium iodide (6) [3]

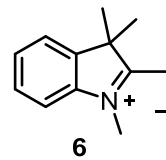

$^1\text{H}$  NMR

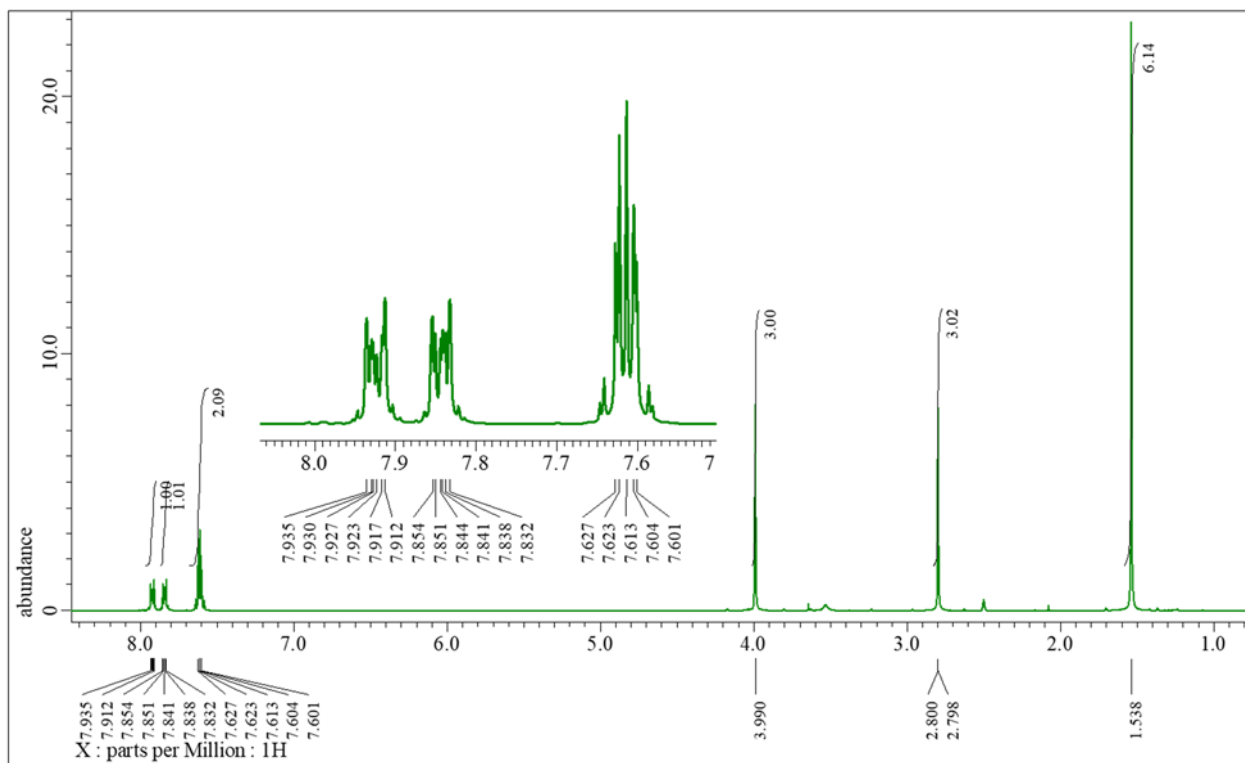

$^{13}\text{C}$  NMR

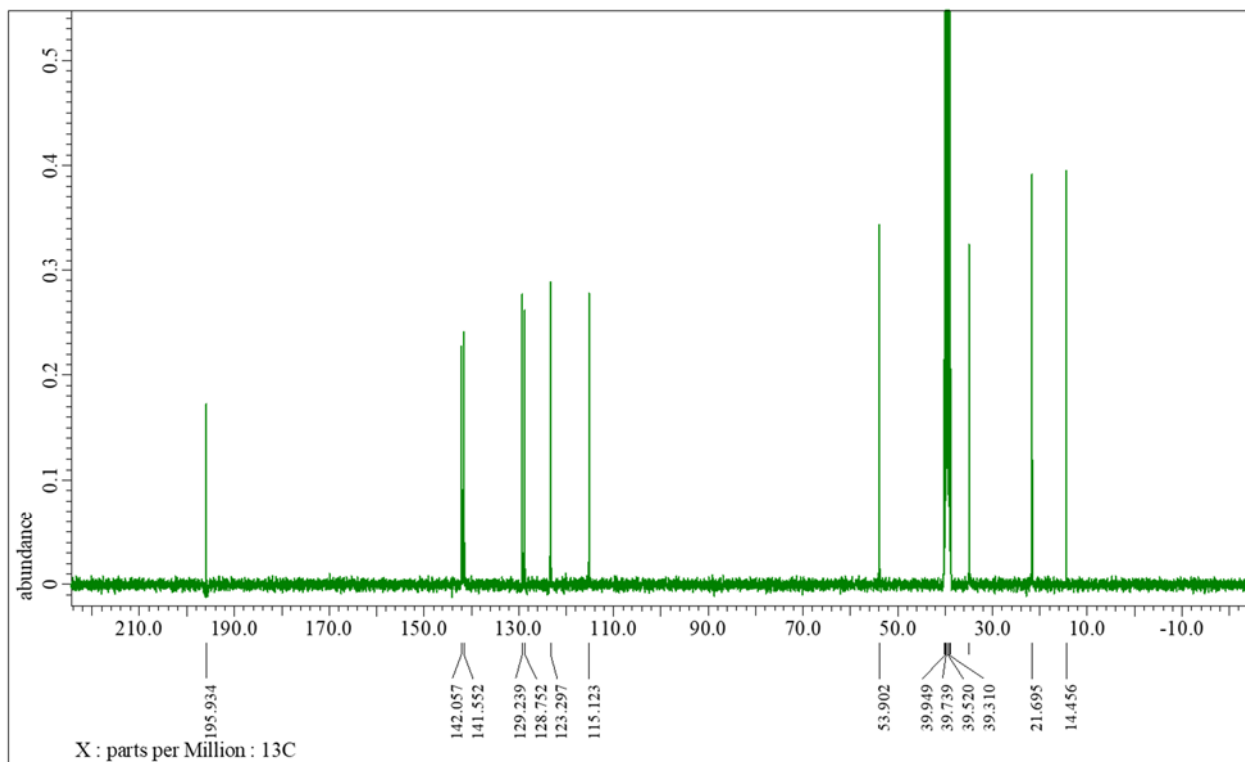

## IR

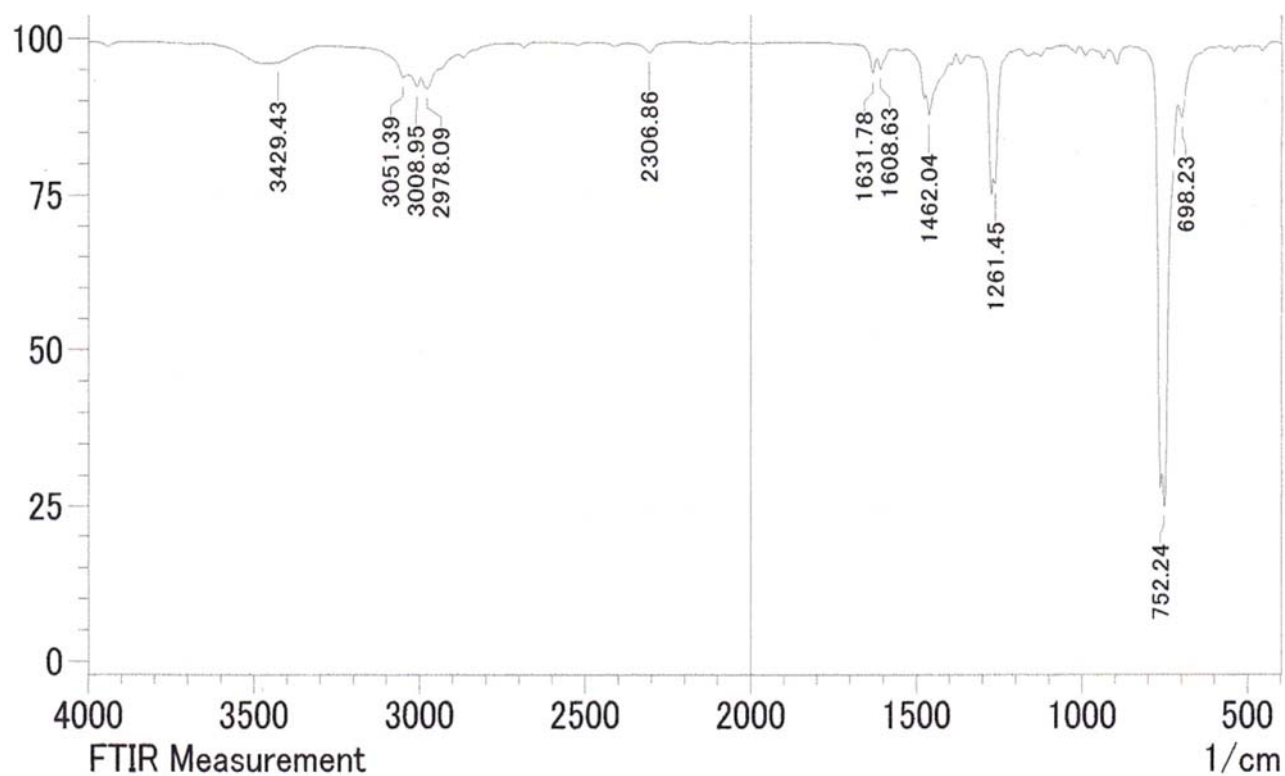

## HRMS

Monoisotopic Mass, Even Electron Ions

5 formula(e) evaluated with 1 results within limits (up to 50 closest results for each mass)

Elements Used:

C: 12-12 H: 16-16 N: 1-1 Na: 0-1 Se: 0-2

20211220\_7 7 (0.250)

1: TOF MS ES+

6.21e+004

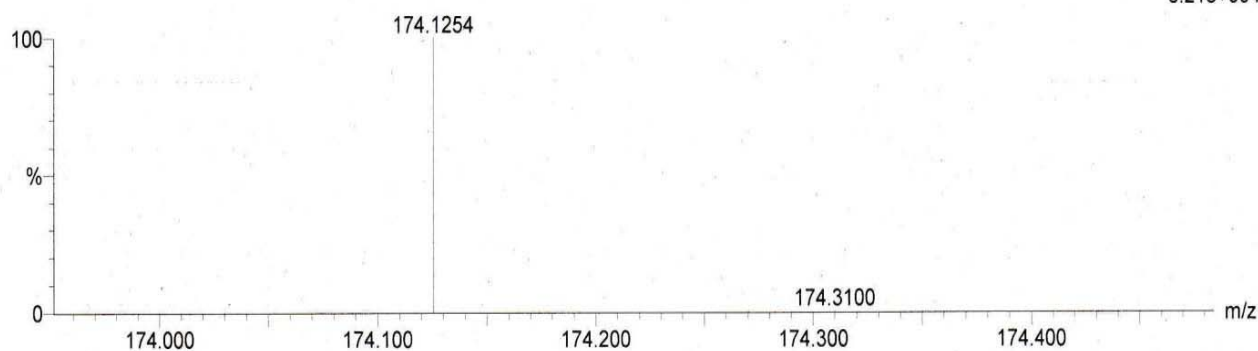

Minimum: -1.5  
Maximum: 1000.0 10.0 50.0

| Mass     | Calc. Mass | mDa  | PPM   | DBE | i-FIT | i-FIT (Norm) | Formula   |
|----------|------------|------|-------|-----|-------|--------------|-----------|
| 174.1254 | 174.1283   | -2.9 | -16.7 | 5.5 | 42.7  | 0.0          | C12 H16 N |

2-((*E*)-2-((*E*)-2-chloro-3-(2-((*E*)-1,3,3-trimethylindolin-2-

ylidene)ethylidene)cyclohex-1-en-1-yl)vinyl)-1,3,3-trimethyl-3*H*-indol-1-

ium iodide (7). [4]

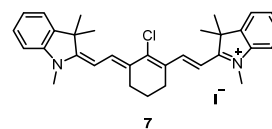

<sup>1</sup>H NMR

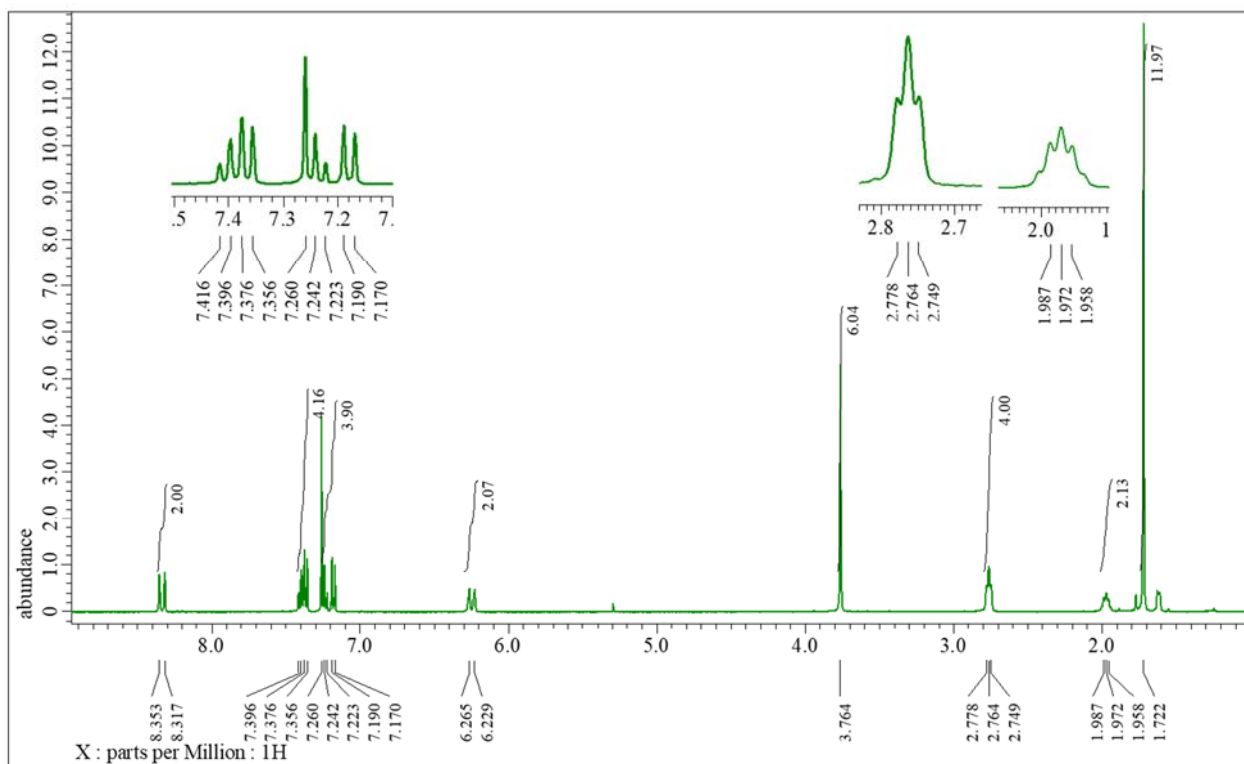

<sup>13</sup>C NMR

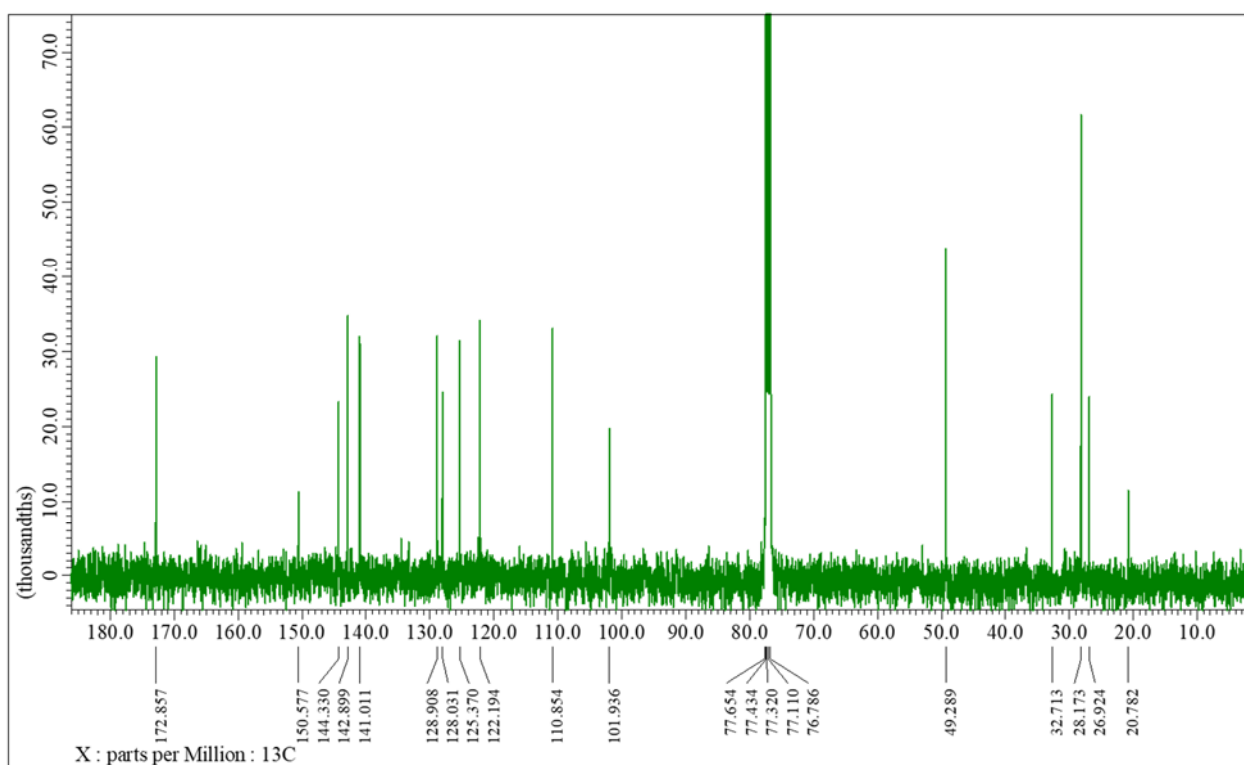

## IR

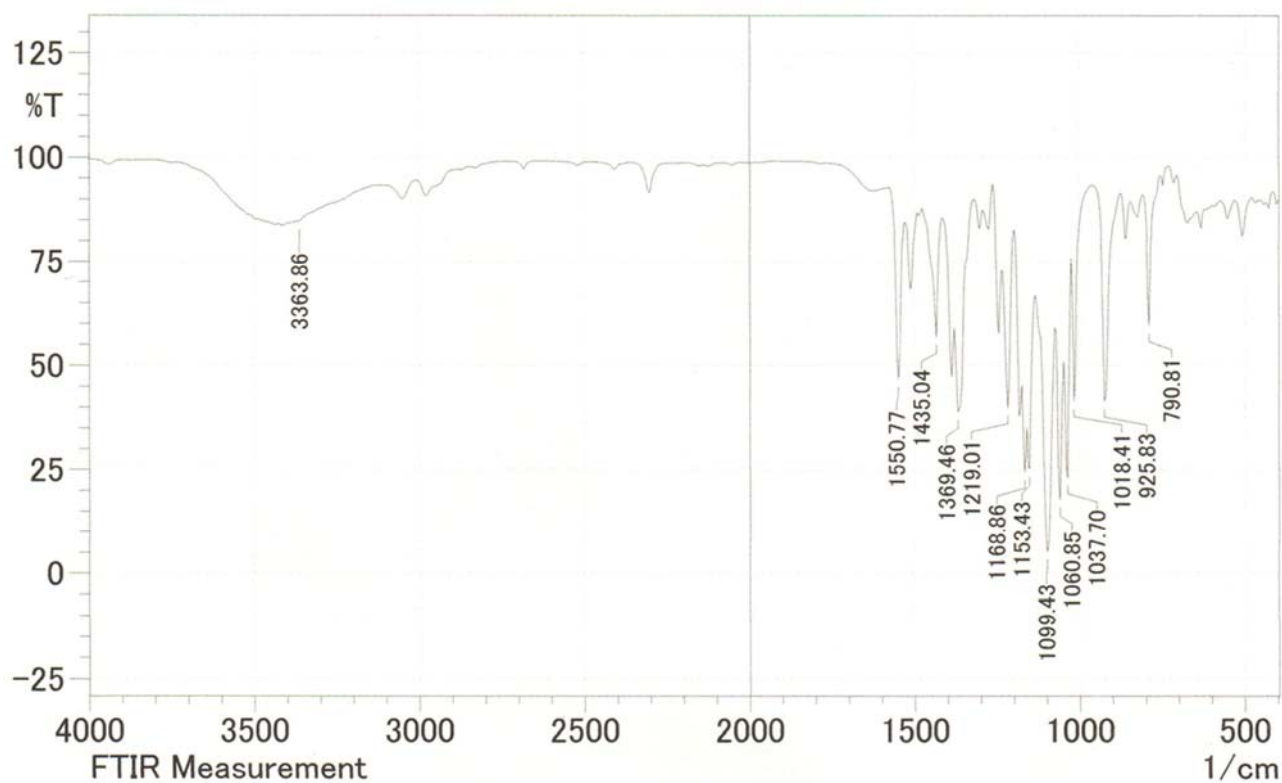

## HRMS

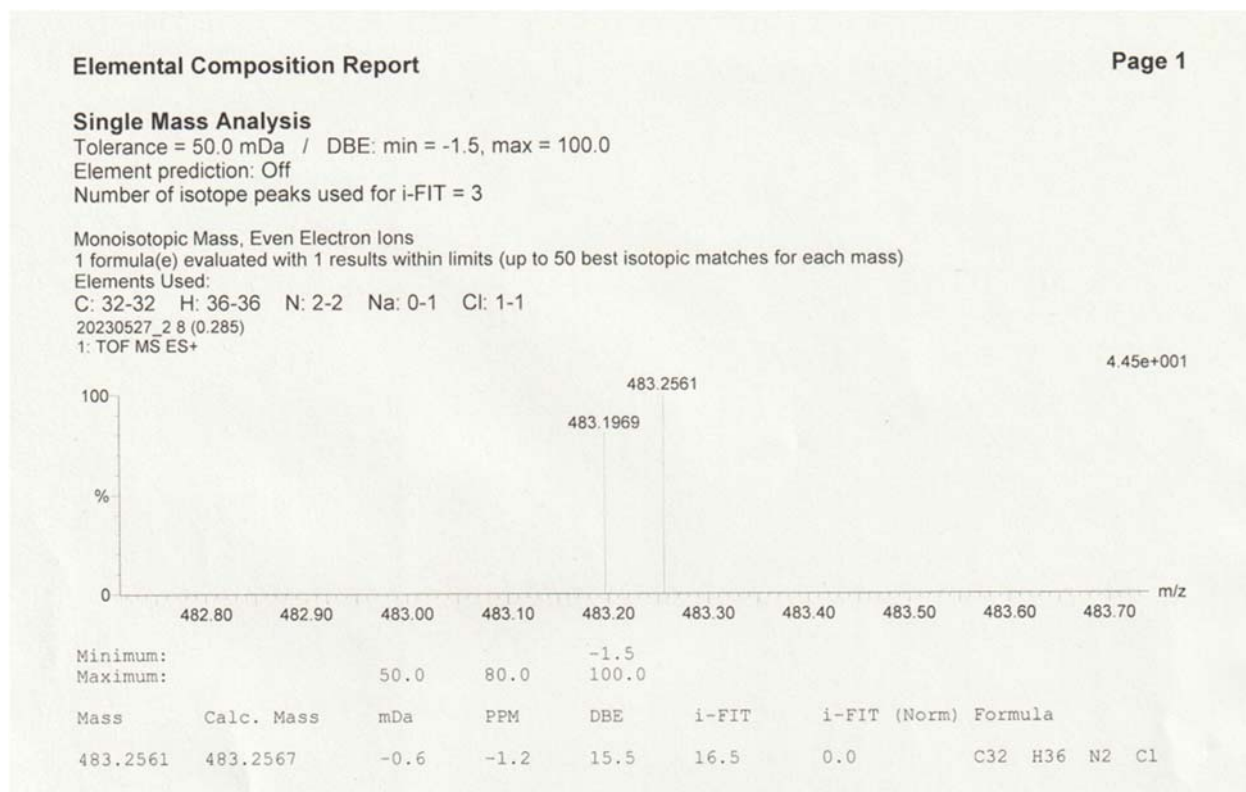

2-((*E*)-2-((*E*)-2-Chloro-3-(2-((*E*)-1,3,3-trimethylindolin-2-

ylidene)ethylidene)cyclohex-1-en-1-yl)vinyl)-1,3,3-trimethyl-3H-indol-1-

ium ((*Z*)-4-((*E*)-2-(2-chloro-3-((*E*)-2-(4-cyano-5-(dicyanomethylene)-2-

methyl-2-(trifluoromethyl)-2,5-dihydrofuran-3-yl)vinyl)cyclohex-2-en-1-ylidene)ethylidene)-3-

cyano-5-methyl-5-(trifluoromethyl)-4,5-dihydrofuran-2-yl)dicyanomethanide (8a)

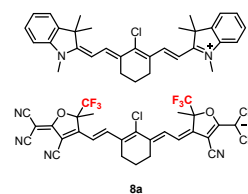

<sup>1</sup>H NMR

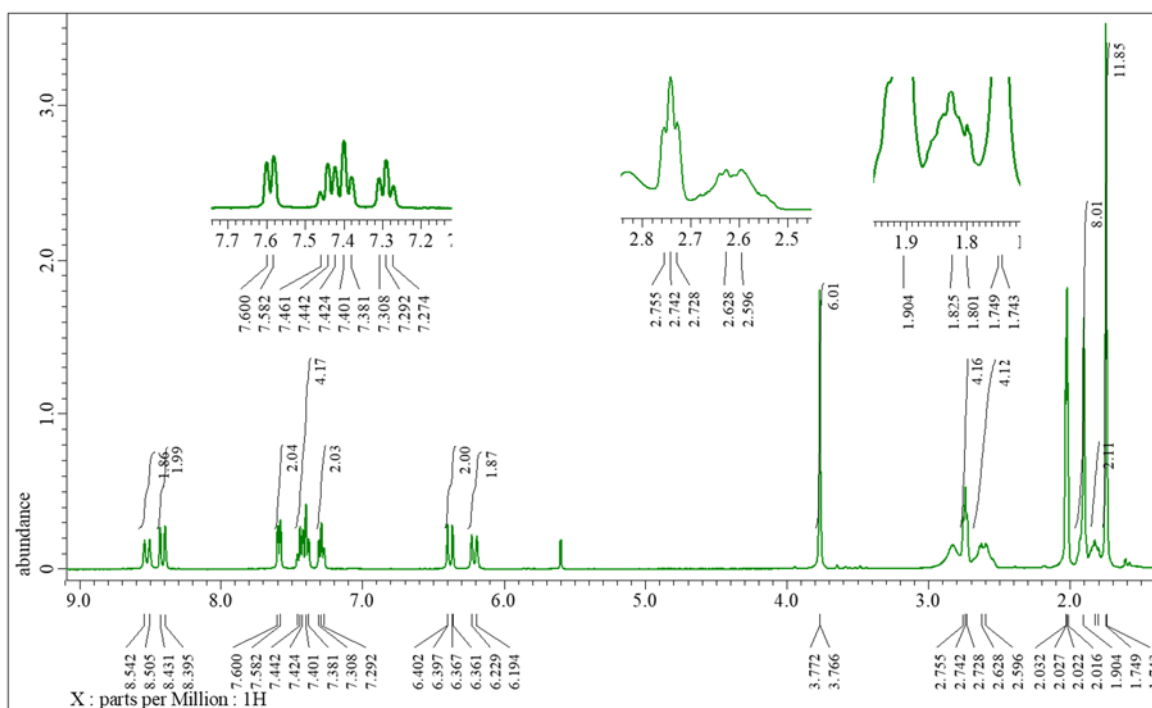

<sup>13</sup>C NMR

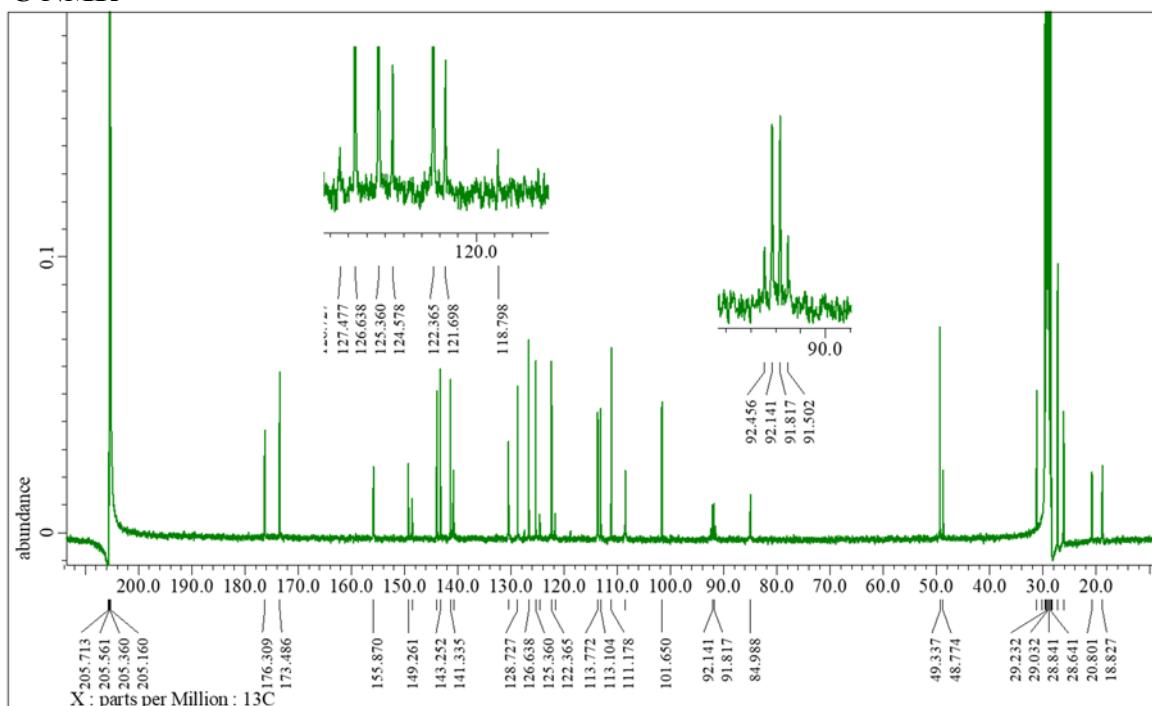

## $^{19}\text{F}$ NMR

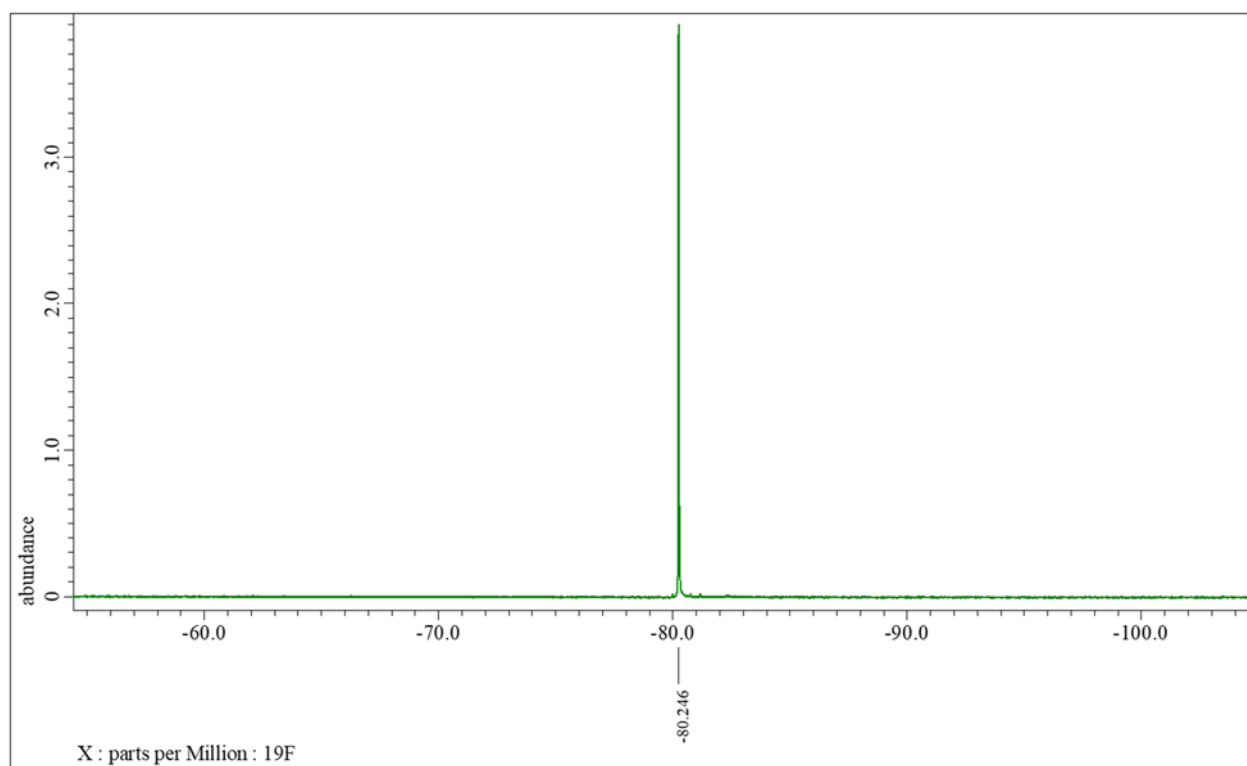

## IR

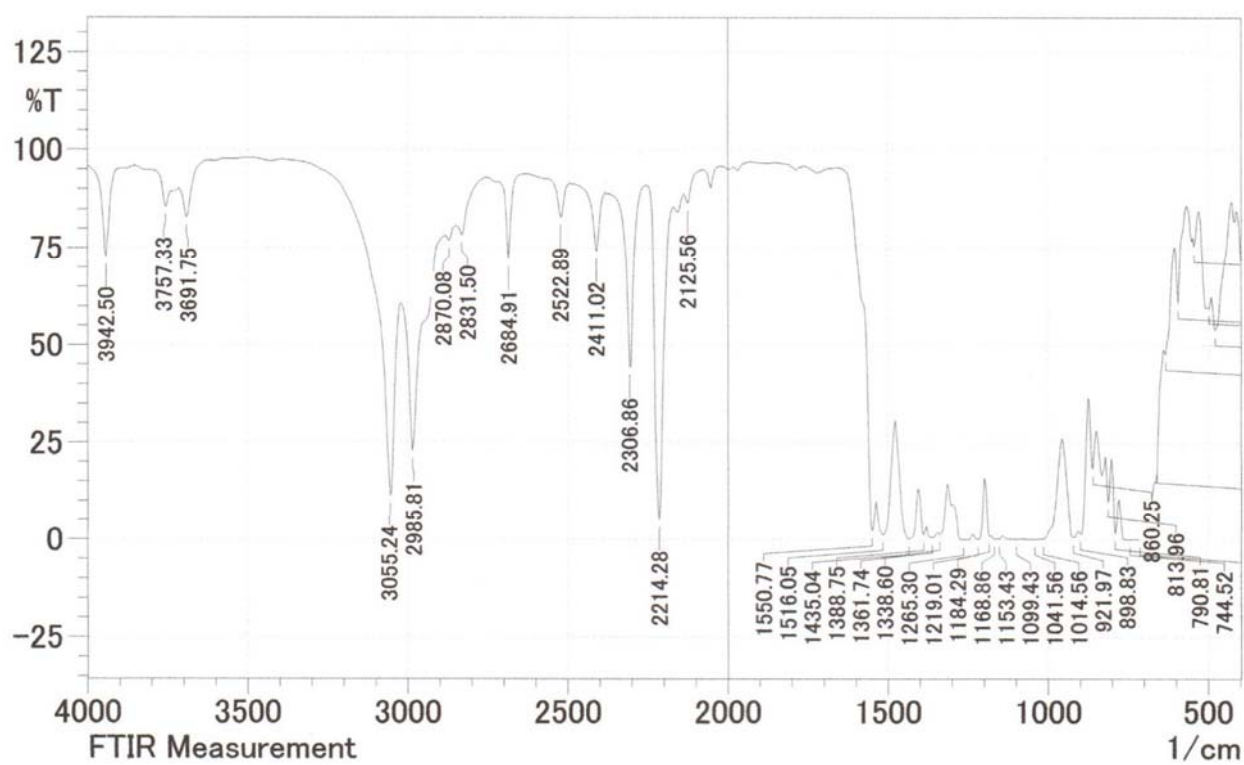



## Elemental Composition Report

Page 1

## Single Mass Analysis

Tolerance = 30.0 mDa / DBE: min = -1.5, max = 50.0

Element prediction: Off

Number of isotope peaks used for i-FIT = 3

Monoisotopic Mass, Even Electron Ions

1 formula(e) evaluated with 1 results within limits (up to 50 best isotopic matches for each mass)

Elements Used:

C: 32-32 H: 36-36 N: 2-2 Na: 0-1 Cl: 1-1

20230422\_6 23 (0.808)

1: TOF MS ES+

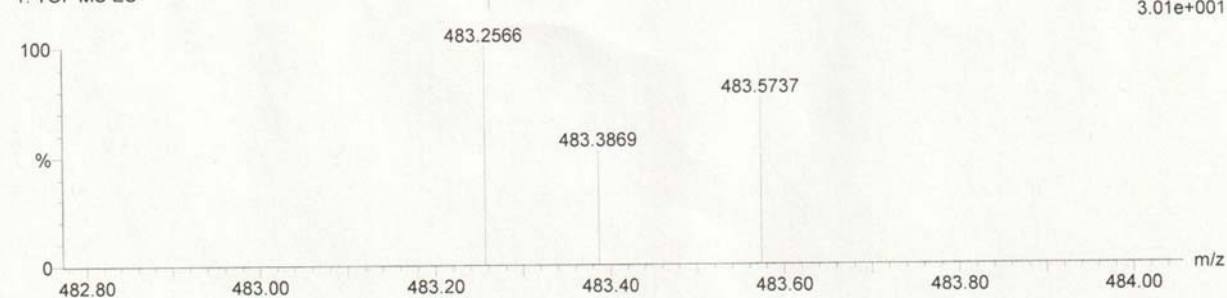

|          |            |      |      |      |       |              |               |
|----------|------------|------|------|------|-------|--------------|---------------|
| Minimum: |            |      |      | -1.5 |       |              |               |
| Maximum: | 30.0       | 80.0 | 50.0 |      |       |              |               |
| Mass     | Calc. Mass | mDa  | PPM  | DBE  | i-FIT | i-FIT (Norm) | Formula       |
| 483.2566 | 483.2567   | -0.1 | -0.2 | 15.5 | 27.4  | 0.0          | C32 H36 N2 Cl |

## Elemental Composition Report

Page 1

## Single Mass Analysis

Tolerance = 50.0 mDa / DBE: min = -1.5, max = 100.0

Element prediction: Off

Number of isotope peaks used for i-FIT = 3

Monoisotopic Mass, Even Electron Ions

2 formula(e) evaluated with 1 results within limits (up to 50 best isotopic matches for each mass)

Elements Used:

C: 30-30 H: 16-16 N: 6-6 O: 2-2 F: 6-6 Na: 0-1 Cl: 1-1

20230422\_5-1 8 (0.284)

1: TOF MS ES-

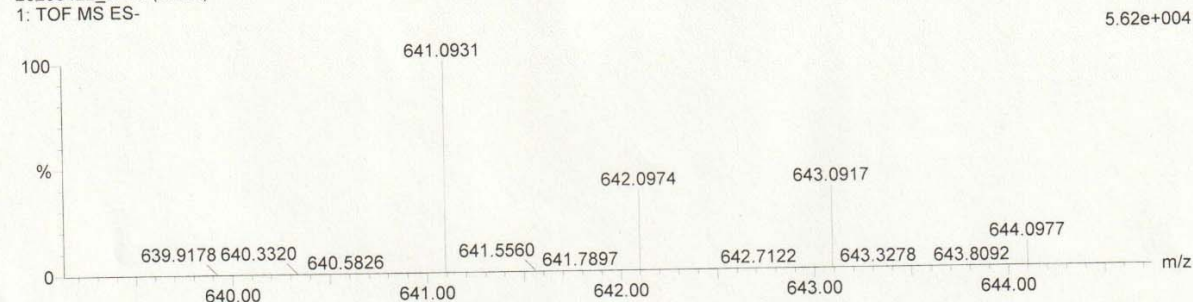

|          |            |      |       |      |       |              |                     |
|----------|------------|------|-------|------|-------|--------------|---------------------|
| Minimum: |            |      |       | -1.5 |       |              |                     |
| Maximum: | 50.0       | 80.0 | 100.0 |      |       |              |                     |
| Mass     | Calc. Mass | mDa  | PPM   | DBE  | i-FIT | i-FIT (Norm) | Formula             |
| 641.0931 | 641.0927   | 0.4  | 0.6   | 22.5 | 73.6  | 0.0          | C30 H16 N6 O2 F6 Cl |



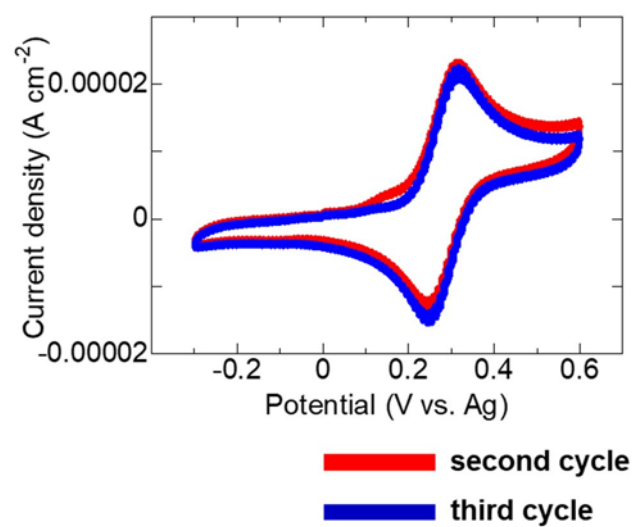

**Figure S1.** Cyclic voltammograms of the prepared anionic HMC dyes **5a** ( $1.0 \times 10^{-3}$  M) in MeCN containing Bu<sub>4</sub>NClO<sub>4</sub> (0.1 M) as the supporting electrolyte; scan rate of 200 mV s<sup>-1</sup>

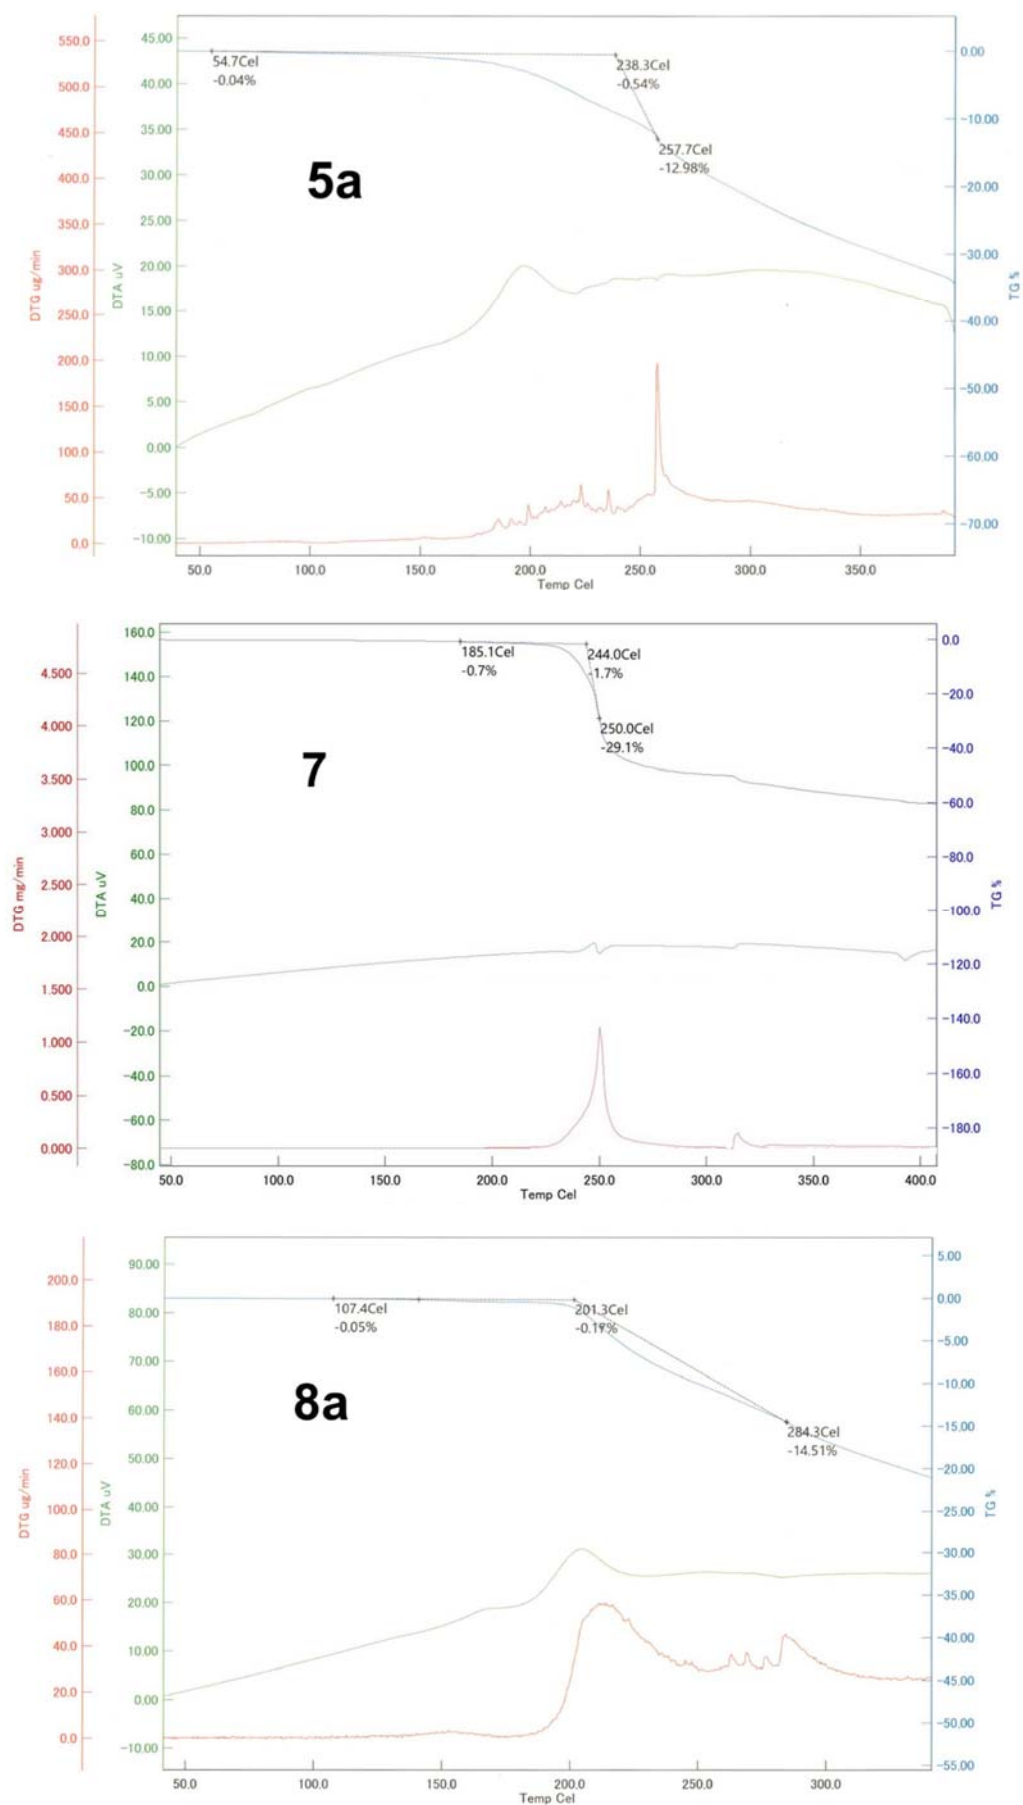

Figure S2. Results of TG-DTA measurements for **5a** and **7a**

## References

1. Liu, S.; Haller, M.A.; Ma, H.; Dalton, L.R.; Jang, S.-H.; Jen, A. K.-Y. Focused Microwave-Assisted Synthesis of 2,5-Dihydrofuran Derivatives as Electron Acceptors for Highly Efficient Nonlinear Optical Chromophores. *Adv. Mater.*, **2003**, *15*, 603–607.
2. Mukherjee, A.; Saha, P. C.; Das, R. S.; Bera, T.; Guha, S. Acidic pH-Activatable Visible to Near-Infrared Switchable Ratiometric Fluorescent Probe for Live-Cell Lysosome Targeted Imaging. *ACS Sens.*, **2021**, *6*, 2141–2146.
3. Burdette, M. K.; Jenkins R.; Bandera, Y. P.; Jones, H.; Foulger, I. K.; Dickey, A.; Nieminen, A-L.; Foulger, S. H. Click-Engineered, Bioresponsive, and Versatile Particle–Protein–Dye System. *ACS Appl. Bio Mater.*, **2019**, *2*, 8, 3183– 3193.
4. Shibayama, M.; Uehashi, Y.; Ajioka, S.; Kubota, Y.; Inuzuka, T.; Funabiki, K. Vapochromism of indolenine-based heptamethine cyanine dye adsorbed on silica gel. *New J. Chem.*, **2023**, *47*, 5262- 5269.
